# Supplementary material
Source: PubMed Central journal article supplement (PMC6907734)
Supplement: NIHMS976117-supplement.pdf [file NIHMS976117-supplement.pdf]

**Neuron, Volume 98**

**Supplemental Information**

**Unsupervised Discovery of Demixed,  
Low-Dimensional Neural Dynamics across Multiple  
Timescales through Tensor Component Analysis**

**Alex H. Williams, Tony Hyun Kim, Forea Wang, Saurabh Vyas, Stephen I. Ryu, Krishna V. Shenoy, Mark Schnitzer, Tamara G. Kolda, and Surya Ganguli**

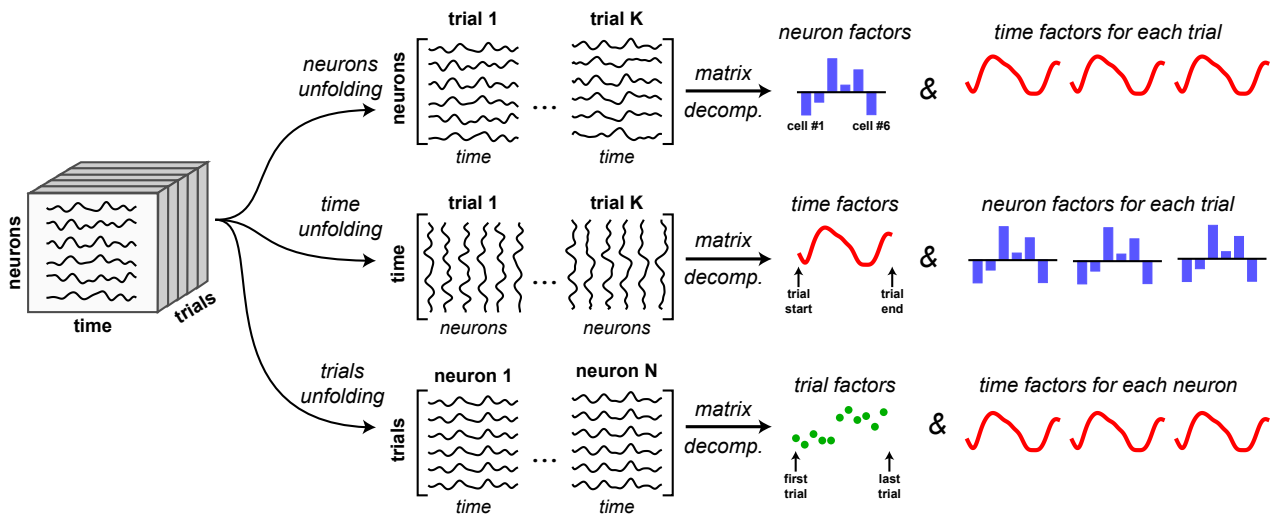

**Figure S1.** Related to Figure 2. Illustration of *tensor unfolding* for applying matrix decompositions to tensor datasets. A  $N \times T \times K$  dimensional tensor can be reshaped into three different matrices: a “neurons unfolding” with dimensions  $N \times TK$ , a “time unfolding” with dimensions  $T \times NK$ , and a “trials unfolding” with dimensions  $K \times NT$ . Applying PCA or other matrix decomposition methods to each unfolding yields a different set of low-dimensional factors.

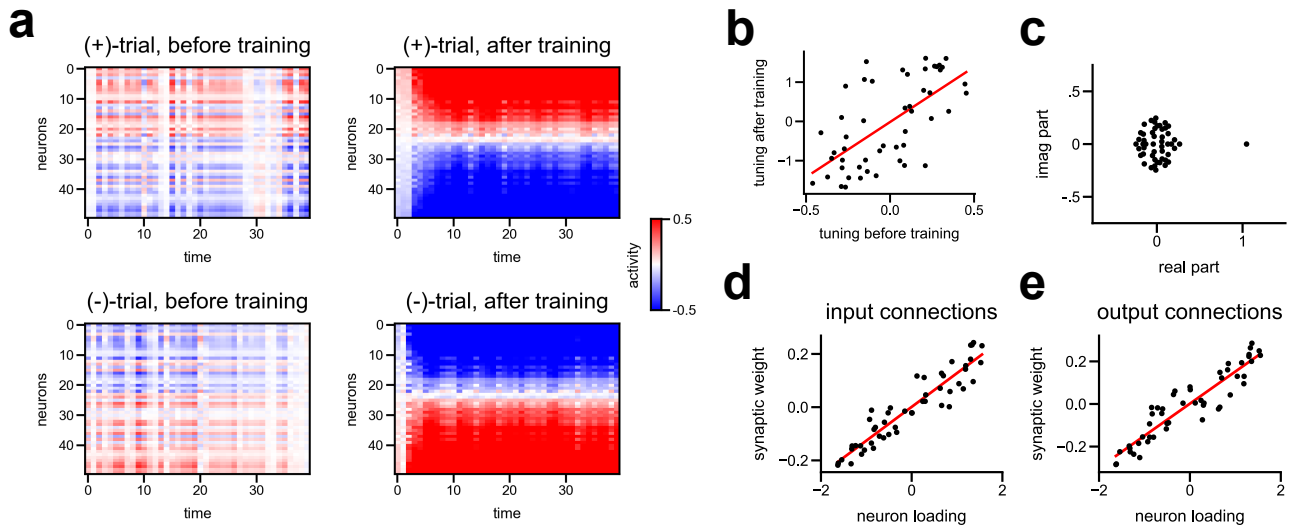

**Figure S2. Related to Figure 3.** Cell tuning and synaptic connectivity properties in a nonlinear RNN trained on a stimulus discrimination task. **(a)** Activity of all cells on (+)-trials and (-)-trials before and after training. Cells were sorted by the low-dimensional neuron factor,  $w_n^1$ , as in Figure 3e. **(b)** Cell tuning quantified as peak activity on (+)-trials minus peak activity on (-)-trials before and after training (averaged over ten trials). Cells with positive tuning scores are (+)-cells, while cells with negative tuning scores are (-)-cells. The initial tuning was positively correlated with final tuning for each cell. **(c)** Eigenvalues of the synaptic connectivity matrix after training. Similar to the solution in linear networks, the connectivity matrix has a single eigenvalue near  $1 + 0i$ ; and all other eigenvalues are small in magnitude. **(d-e)** The neuron factor identified by a 1-component TCA model is positively correlated with the input-to-network synaptic weights **(d)**, and the network-to-output weights **(e)**.

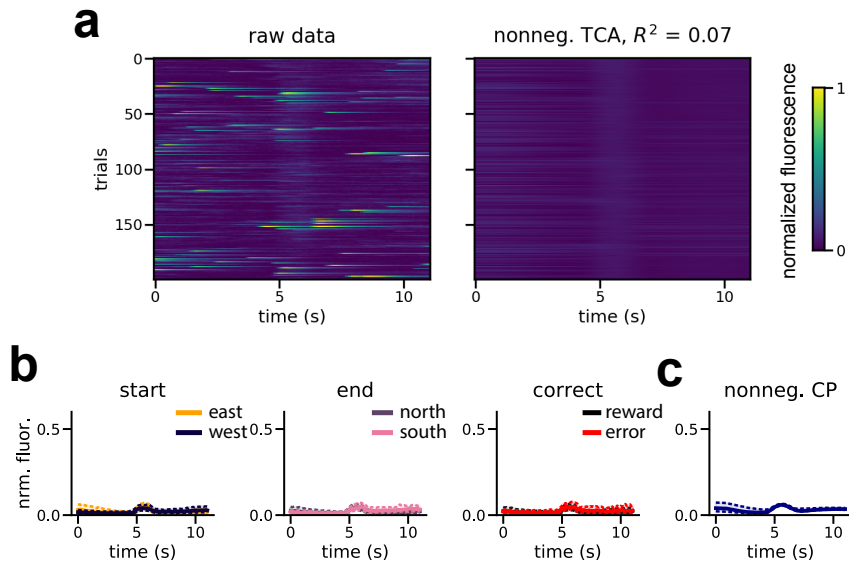

**Figure S3. Related to Figure 4.** An example cell with low  $R^2$ . **(a)** Raster heatmaps showing the cell's fluorescence over the 200 most active trials (left), and the estimate of a 15-component nonnegative TCA model on these trials (right). On a small subset of trials the cell is active, but at variable phases of the trial. Note that on the remaining trials, the cell was hardly active at all (not shown). **(b)** Median fluorescence traces averaged over various task variables (start location, end location, and reward delivery). The cell does not, on average, show a preference for any task variable. Dashed lines denote the first and third quartiles of the fluorescence trace. **(c)** Median estimated fluorescence of the 15-component nonnegative TCA model for this cell. The estimate is closely matched to the median firing rates shown in panel b. Dashed lines denote first and third quartiles.

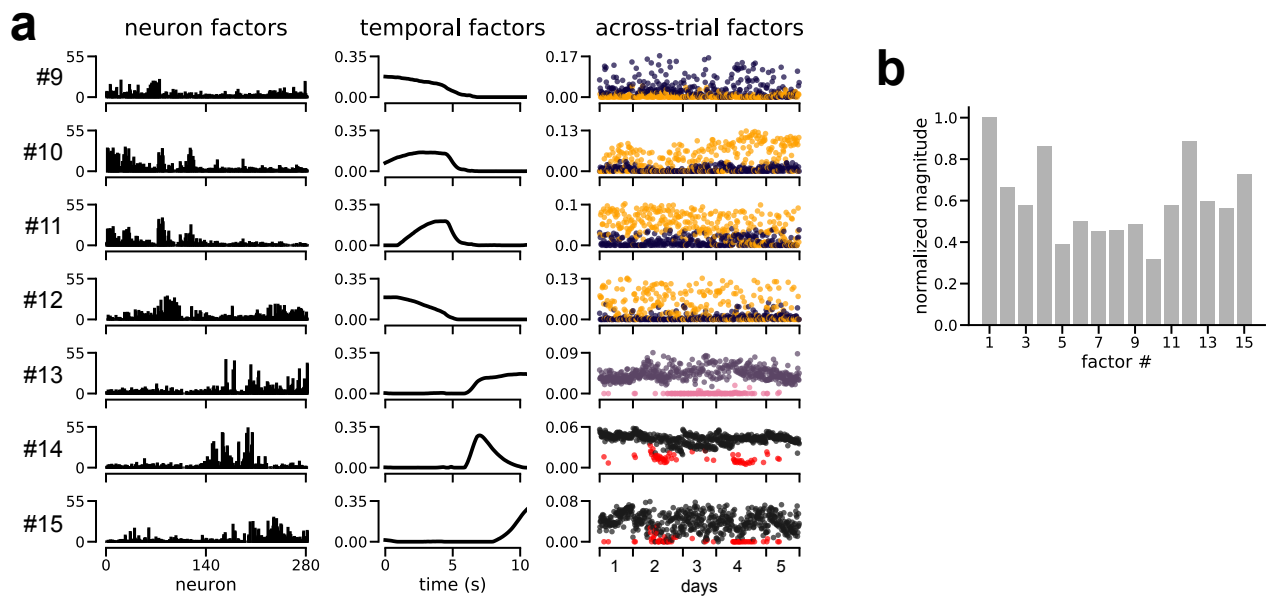

**Figure S4. Related to Figure 6.** Additional detail on the decomposition of mouse prefrontal cortex dynamics. **(a)** Remaining seven TCA factors from the 15-component decomposition shown in Figure 6. **(b)** The magnitude (Euclidean length) of each factor in the decomposition, a metric analogous to the variance explained by each component (see *Methods*).

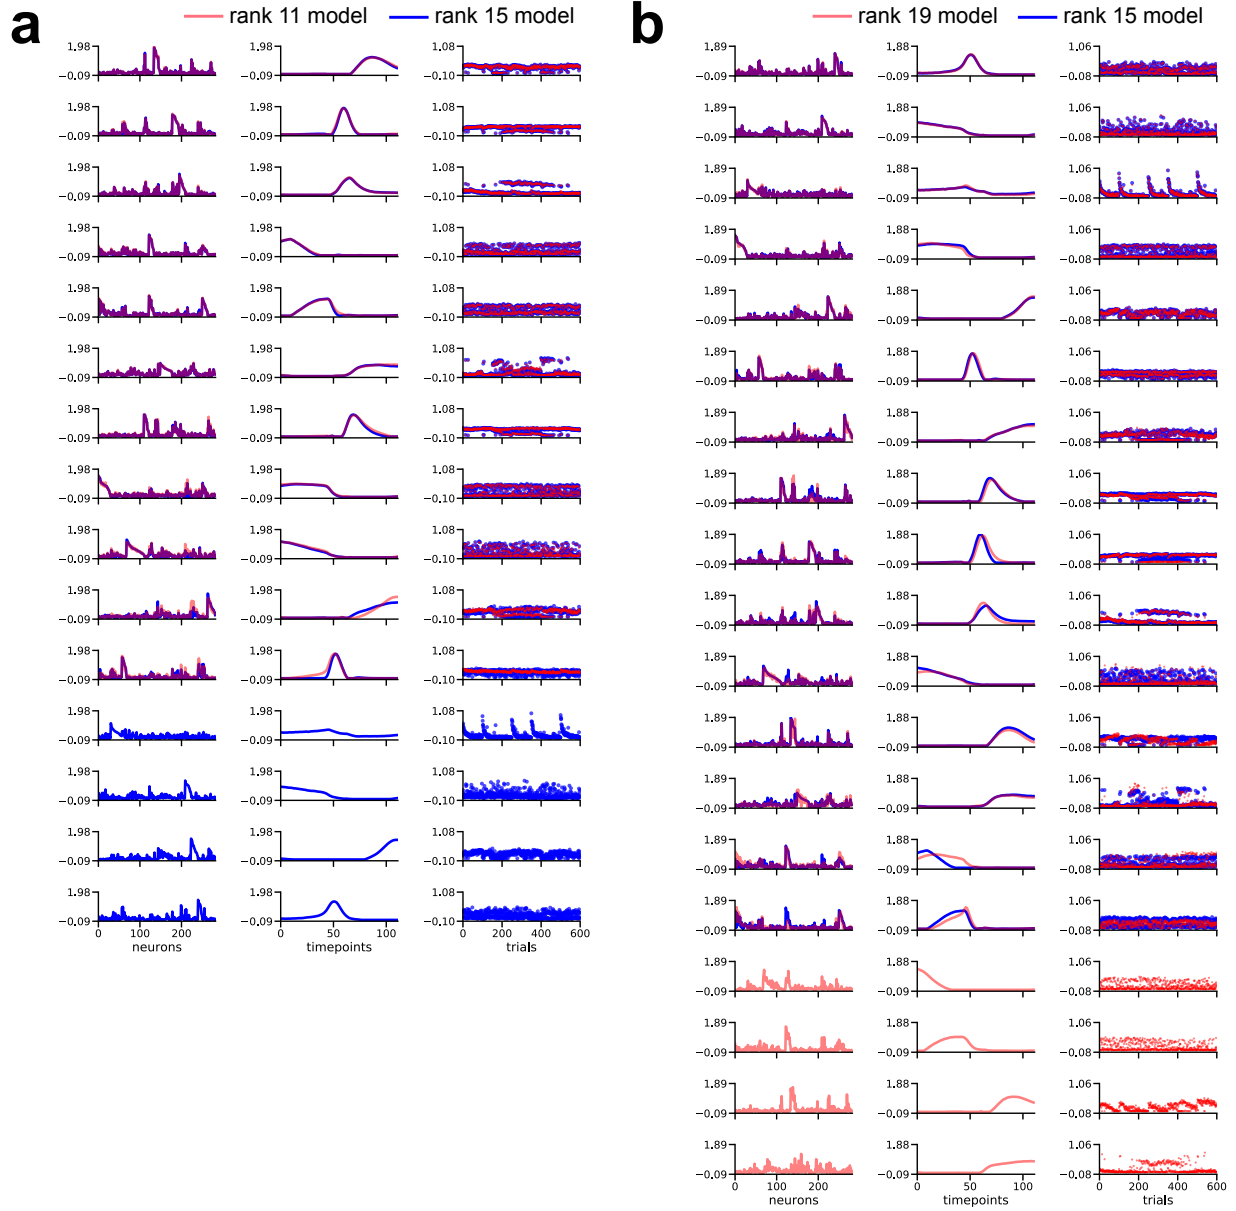

**Figure S5. Related to Figure 6.** Nonnegative TCA identifies similar factors for different choices of  $R$  in the mouse prefrontal cortex dataset. **(a)** The best-fit 15 component model (blue), aligned with the best-fit 11 component model (red). Columns show neural factors (left), temporal factors (middle), and trial factors (right). Rows show components, which are ordered from most similar to least similar. Extra/unmatched components are shown at the bottom. **(b)** Same as panel a except the best-fit 15 component model (blue) is aligned with the best-fit 19 component model (red).

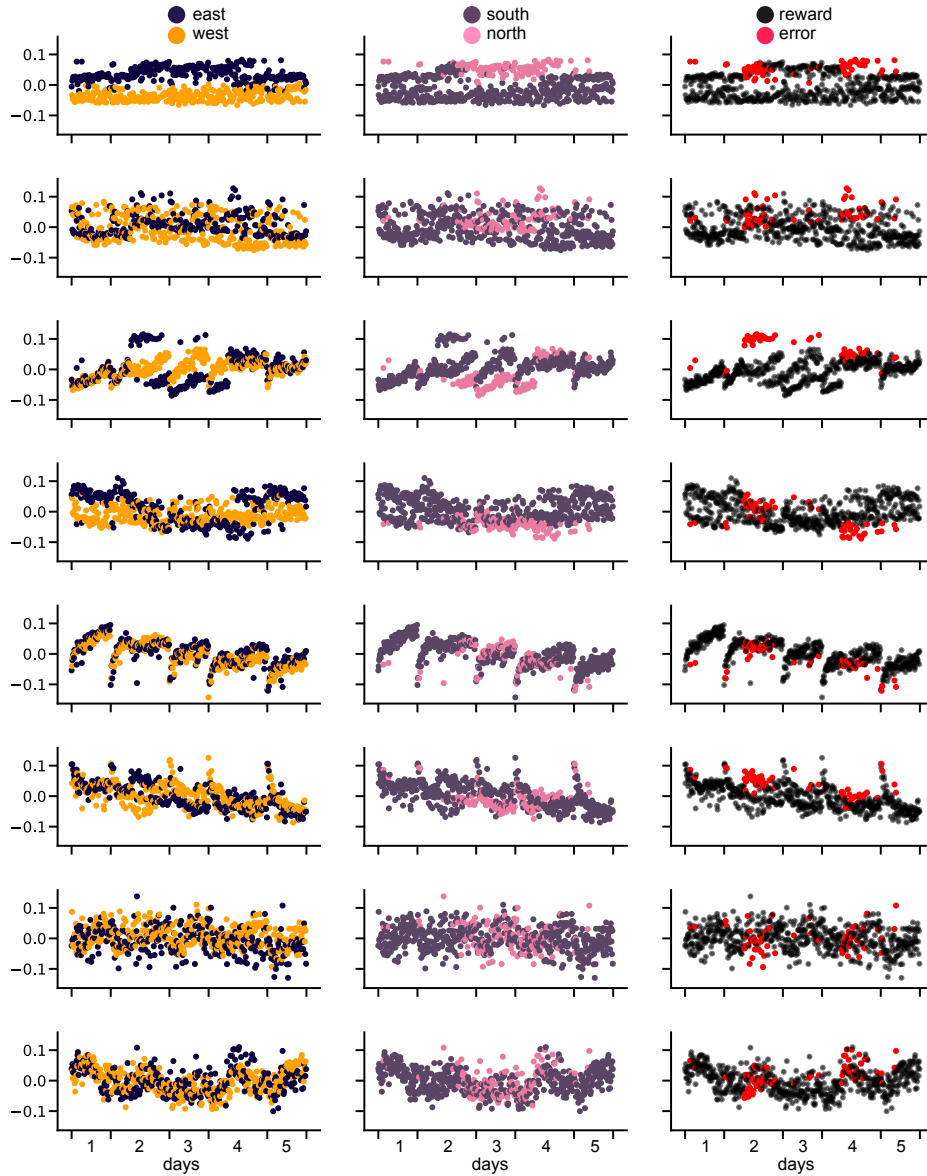

**Figure S6. Related to Figure 6.** PCA components obtained from the *trials unfolding matrix* (see Figure S1) do not cleanly encode individual task variables. Each row shows a principal component, ordered by variance explained. Each column shows a different coloring of that principal component by a different task variable. With few exceptions (notably the top component), any single coloring does not yield a simple interpretation of the component.

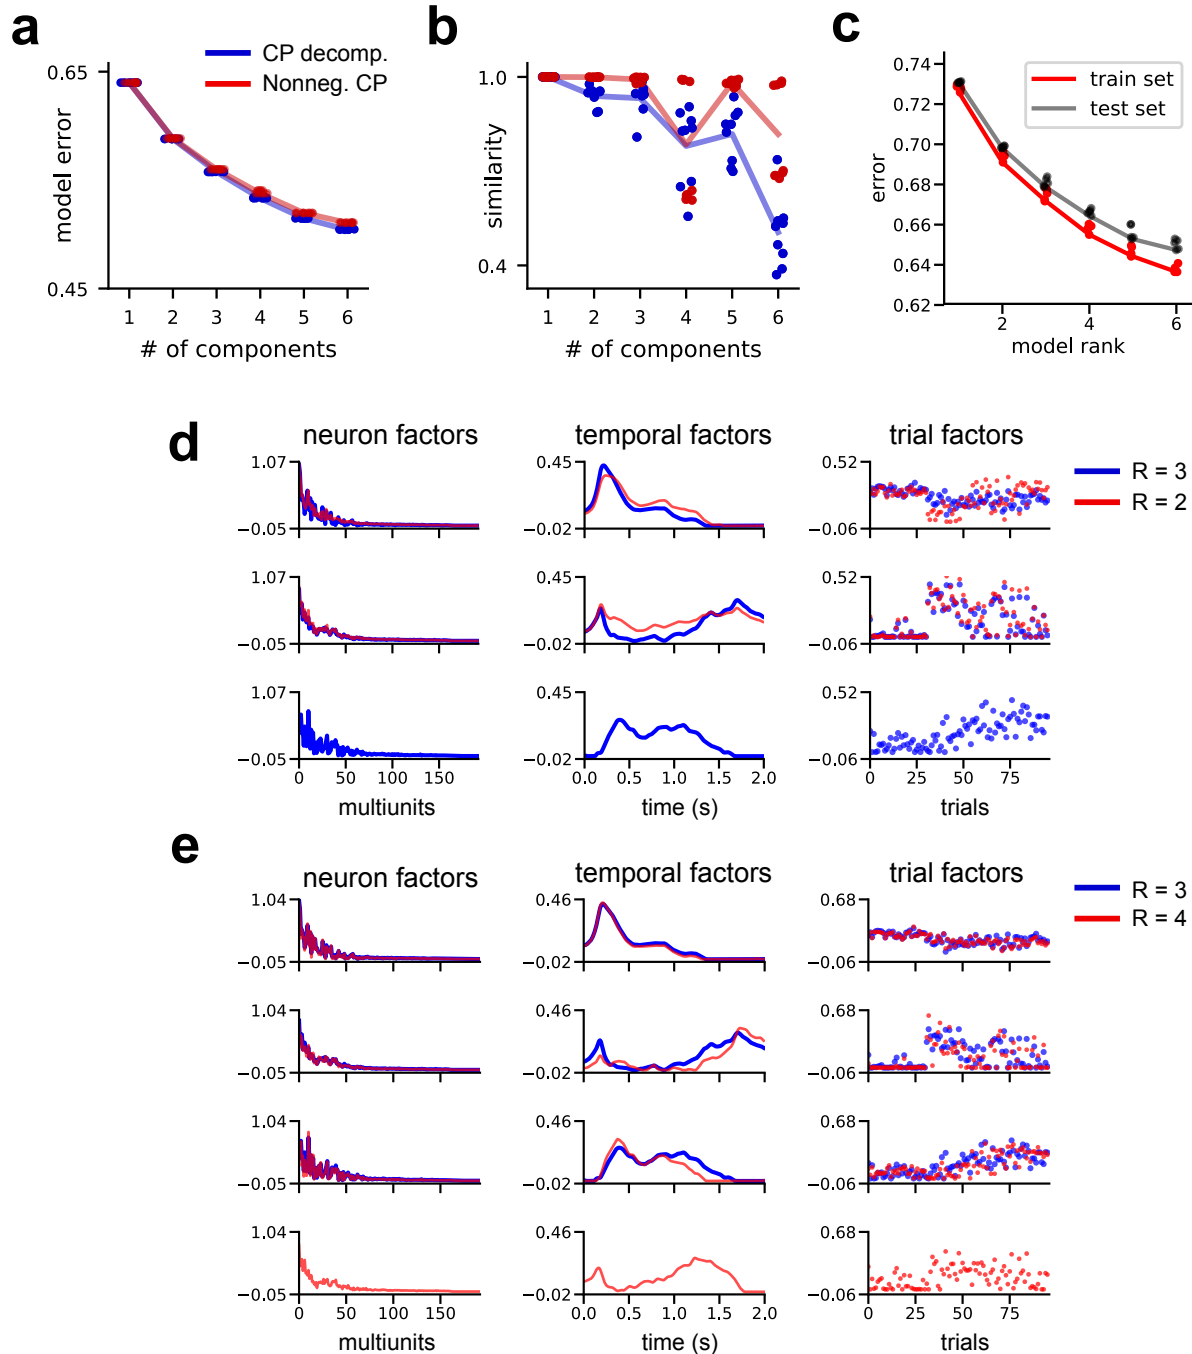

**Figure S7. Related to Figure 7.** Diagnostic plots for TCA models fit to 45 degree reaches in the primate BMI dataset. **(a)** Error plot for standard (blue) and nonnegative (red) TCA. As elsewhere in this manuscript, each dot denotes a model fit from different initial parameters, demonstrating that neither model got caught in appreciably suboptimal local minima during optimization. Nonnegative decomposition provided similar explanatory power to standard decompositions. **(b)** Similarity plot for standard (blue) and nonnegative (red) CP decompositions. As in other figures, each dot denotes the similarity score between a model and the best-fit model with the same number of components. Nonnegative decomposition had larger similarity scores, suggesting that the latent factors were more reliably identified and less sensitive to initialization. **(c)** Cross-validation of the 45 degree reach dataset, using the procedure described in Figure 5; 80% of the data tensor was heldout at random. **(d)** Comparison of an  $R = 2$  nonnegative TCA model (red) with the  $R = 3$  model (blue) examined in the main text. The first component of the  $R = 2$  model (top row, red) contains features of both the first and third components of the  $R = 3$  model (top and bottom rows, blue). **(e)** Comparison of an  $R = 4$  nonnegative TCA model (red) with the  $R = 3$  model (blue) examined in the main text. The last component of the  $R = 4$  model (bottom row, red) resembles the second component of the  $R = 3$  model. Thus, adding an additional component did not add qualitatively new insights.
